# Supplementary material for: Sicherheit der maschinellen Autotransfusion in der Tumorchirurgie
Source: Springer Nature journal article supplement (doi:10.1007/s00101-020-00751-4), 2020-03-27
Supplement: MOESM1 [file 17838422]

# Empfehlung der Interdisziplinären Arbeitsgemeinschaft für Klinische Hämotherapie

## Bewertung der Meta-Analyse zur MAT in der Tumorchirurgie

Diese Empfehlung der IAKH ergeht auf der Basis des Vorstandsbeschlusses vom 10.10.2019. Sie steht in Ergänzung zur aktuell gültigen Richtlinie Hämotherapie 2017, die bislang ausschließlich die Bestrahlung der autologen MAT-Konserven aus tumorchirurgischen Eingriffen gestattet.

Die IAKH hat die Meta-Analyse in dieser Ausgabe der Fachzeitschrift „DER ANÄSTHESIST“ bei den Autoren mit dem Ziel in Auftrag gegeben, dass die deutschen Leitlinien an internationale Empfehlungen angepasst werden können.

**Abkürzungen:** MAT- maschinelle Autotransfusion, EK- Erythrozytenkonzentrat, PCR- Polymerase-Kettenreaktion, RCT-randomisierte kontrollierte Studie, RNA-Ribonukleinsäure

### Bewertung der Meta-Analyse

Es findet sich in der Literatur kein Hinweis auf eine auf den Einsatz der MAT zurückzuführende Metastasierung, Rezidiv oder Tumorprogress für die meisten chirurgisch therapierten Tumoren.

Allerdings ist die Qualität der Evidenz für die Anwendung der MAT und des LDF schlecht und beruht im Wesentlichen auf Observations- und Kohortenstudien mit kleineren Fallzahlen. Für eine randomisierte Studie (RCT) würden beispielsweise in der kolorektalen Chirurgie 1000 Patienten benötigt, um bei einer angenommenen Überlebensrate von 40% einen Vorteil von 10% durch den Einsatz der MAT zu zeigen. Ein Sicherheitssignal kommt aus der ansehnlich hohen Fallzahl aus Untersuchungen mit Vergleichsgruppen und das Fehlen eines gesicherten

Falls mit Tumorprogression oder Metastasen-Aussaat durch die Verwendung von MAT, während dies auf anderen Gebieten durchaus wiederholt berichtet ist: Es existieren drei gleichlautende Fallberichte zur hämatogenen Übertragung von speziellen Malignomen von Mutter auf Fötus und durch Nadelstiche während der Operation [4] [10] [13]. Die Observations- und Kohortenstudien testeten die MAT für chirurgische Eingriffe an Karzinomen von Nieren und Blasen, Prostata, Ovar, Leber, Kolon und Rektum, Bronchien/Lungen sowie der Metastasenchirurgie der Wirbelsäule und den Tumoreinbruch in Blutgefäße (siehe Tab. 1). Diese Studien setzten meist MAT ohne LDF ein.

Leukozytendepletionsfilter sind in dieser Indikation und Effektivität mittlerweile ausreichend erforscht und reduzieren die Tumorzellen mit einer ebenbürtigen, wenn nicht höheren Effektivität als die Bestrahlung. Zwar fand sich je nach Nachweismethode in einigen Studien noch vereinzelt Tumormaterial (bei PCR-Nachweis von RNA-Fragmenten) im unfiltrierten MAT-EK, allerdings ohne Hinweis auf metastasierendes Potenzial und quantitativ lag die Konzentration unter der im Blut zirkulierenden Menge [7]. Die verlässlichste und sensitivste Methode zum Tumorzellnachweis bei der Beurteilung der Leukozytenfiltration ist in den Arbeiten von Liang et al. [8] eingesetzt worden. Demnach ist ein Leukozytendepletionsfilter sicher ausreichend zur Beseitigung von Tumorzellen im Retransfundat. Die handelsüblichen Modelle eliminieren  $10^7$ - $10^8$  Zellen pro 200ml Blut. Laut Hansen et al. finden sich im Retransfundat bei verschiedenen Tumoreingriffen von  $1 \cdot 10^1$  bis zu  $7 \cdot 10^6$ . Damit ist die Leukozytendepletion sicher und effektiv zur nachgewiesenen Beseitigung von Tumorzellen von Prostatatumoren und Nierenzellkarzinomen [2], Osteosarkomen [11], Mammakarzinomen [5], kolorektalem [3] und Pankreas-Karzinom [9], hepatozellulärem Karzinom [8], Endometrium, Cervix und Ovar [1], spinale Metastasen [6] und Bronchialkarzinomen [12].

## Expertenmeinung und Empfehlung der IAKH

Neben der in der Richtlinie Hämotherapie vorgeschriebenen Bestrahlung der autologen Erythrozytenkonzentrate in der Tumorchirurgie ist die weitere Methode der LDF nach intensiver Prüfung der Datenlage als äquivalent einzuschätzen. Als gut durchführbare Alternative zur Bestrahlung bietet sich die MAT mit Einsatz von modernen Leukozytendepletionsfiltern an. Diese ist in der Literatur soweit erforscht und durch Expertenmeinung geteilt, dass die meisten internationalen Fachgesellschaften den Einsatz dieser Methode nicht als Kontraindikation ansehen. Auch die Interdisziplinäre Arbeitsgemeinschaft für Klinische Hämotherapie (IAKH) unterstützt den Einsatz von MAT mit LDF in der Tumorchirurgie. Die Hämotherapierichtlinie 2017 der BÄK empfiehlt ausschließlich eine Bestrahlung und spiegelt damit in diesem Punkt nicht mehr den aktuellen Stand der Wissenschaft und Technik wider.

Da sich in der Literatur keine Hinweise auf eine nachweisbare Aussaat maligner Zellen, vermehrte Metastasierung oder eine gesteigerte Tumorprogression finden lassen, die durch den Einsatz der MAT in der Tumorchirurgie hervorgerufen oder verstärkt würden, erscheint die Befürchtung der unkontrollierten Tumoraussaat durch die MAT unbegründet, vor allem wenn ein LDF eingesetzt wird. Dies ist zwar nicht durch randomisierte kontrollierte Studien belegt, aber durch zahlreiche Beobachtungsstudien mit 2254 Patienten, die MAT-Retransfundat mit oder ohne Leukozytendepletion erhalten hatten, verglichen mit der Behandlung durch Fremd- und (präoperativ gespendetem) Eigenblut. In keiner der überprüften Studien wurde eine Bestrahlung zusätzlich durchgeführt. Damit kann bei vielen Tumorkranken der Einsatz der maschinellen Autotransfusion mit Verwendung eines LDF weitgehend unbedenklich erfolgen. Da insbesondere bei Tumoroperationen die bekannten Risiken der Fremdbluttransfusion einschließlich der Immunmodulation besonders stark wiegen, könnte dieses Kollektiv besonders profitieren.

**Aufgrund der sorgfältigen Neubewertung der Literatur sieht die IAKH den Einsatz der maschinellen Autotransfusion in der Chirurgie solider Tumoren oder Metastasen auch ohne Bestrahlung der autologen Erythrozyten-Konzentrate mit folgenden Zusatzmaßnahmen unkritisch:**

1. *Der Patient mit elektiver Tumorchirurgie und einer Transfusionswahrscheinlichkeit > 10% sollte eine dokumentierte Aufklärung über die Anwendung der MAT erhalten, die die theoretische Gefahr der Tumoraussaat und die Risiken der Fremdblutexposition beinhaltet.*
2. *In einigen Fällen kann der Schweregrad einer präoperativen Tumoranämie nach entsprechender Diagnostik bereits präoperativ gemildert und behandelt werden und somit das Risiko der Fremdblutexposition verkleinert werden.*
3. *Die Verwendung eines Leukozytendepletionsfilters der zweiten Generation wird in dieser Anwendung der MAT empfohlen. Sollte die Flussrate nicht ausreichend sein, sollte eine Druckinfusion nur bis zur Hälfte der Beutelfüllung erfolgen, um die Gefahr der Luftembolie auszuschließen. Wegen der theoretischen Gefahr von Blutdruckabfällen durch die Mediatoren aktivierter Leukozyten sollten entsprechende Katecholamine (Adrenalin/Noradrenalin) eingesetzt werden.*
4. *Sollte die Versorgung mit autologem Blut nicht ausreichend sein, soll rechtzeitig zusätzlich Fremdblut transfundiert werden.*
5. *Chirurgische En-bloc-Tumorresektionen sind vornehmlich dazu geeignet, mit maschineller Autotransfusion begleitet zu werden. Wird im Rahmen des chirurgischen Vorgehens in das Tumorgewebe geschnitten oder die Tumormasse reduziert, soll die Absaugung in das Autotransfusionssystem für diese Momente ausgesetzt werden. Ist das nicht geschehen und der behandelnde Anästhesist sieht dringende Gründe, das Retransfundat einzusetzen, sollen 2 Filtrationsschritte pro 200ml Retransfundat durch je einen Leukozytendepletionsfilter eingesetzt werden. Bei Patienten mit Leukozytose oder Leukämien muss diese Technik derzeit als nicht verlässlich angesehen werden.*
6. *Bei Eingriffen ohne Eröffnung eines malignen Prozesses (Metastasen, Lymphknoten oder Primärtumor) oder Systemerkrankungen wie Hodgkin, Non-Hodgkin Lymphome oder Leukämien ist der Einsatz von MAT auch ohne Bestrahlung des Präparats und ohne Leukozytendepletionsfilter möglich.*
7. *Beim Einsatz der MAT zur chirurgischen Entfernung eines Phäochromozytoms muss mit einem sympathomimetischen Effekt des Retransfundats gerechnet werden, da die Katecholaminspiegel auch im gefilterten Retransfundat erhöht sind.*

Siehe auch unter <https://www.iakh.de/Stellungnahme-iakh.html>

## Unterstützende Hämotherapeuten<sup>1</sup> dieser IAKH Empfehlung:

| Titel | Vorname    | Name        | Tätig in             | Fachrichtung                         | Kommentar |
|-------|------------|-------------|----------------------|--------------------------------------|-----------|
| Prof. | Bernd      | Frössler    | Adelaide, Australien | Anästhesiologie                      | 1         |
| Prof. | Jose A.    | Garcia Erce | Navarra, Spanien     | Transfusionsmedizin                  |           |
| Prof. | Beverly C. | Hunt        | London, England      | Hämatologie, Hämostaseologie         |           |
| Prof. | Sigismond  | Lasocki     | Anger, Frankreich    | Anästhesiologie                      |           |
| Prof. | Manuel     | Munoz       | Malaga, Spanien      | Transfusionsmedizin                  | 2         |
| Prof. | Toby       | Richards    | Perth, Australia     | Gefäßchirurgie                       | 3         |
| Dr.   | Maria B.   | Rondinelli  | Rom, Italien         | Transfusionsmedizin                  |           |
| Prof. | Daffyd     | Thomas      | Chelsea, Wales       | Transfusionsmedizin, Anästhesie      |           |
| Prof. | Jon        | Waters      | Pittsburgh, USA      | Anästhesiologie, Transfusionsmedizin |           |

### Kommentare:

1. **Bernd Frössler:** “We have been using CS in Cancer surgery for a couple of years with re-infusion through LDF. Most of our surgeons are comfortable with the CS proposal in the Cancer setting. Exception Orthopaedics for soft tissue sarcoma.”
2. **Manuel Munoz:** “We are now finishing the 2019-update of the Seville's Document (an Spanish consensus on transfusion alternatives), where we issue a weak recommendation for ICS use, reinfusing processed and leukodepleted salvaged blood, in oncological surgery. This recommendation is based on low quality evidence.”
3. **Toby Richards:** “In the NHS BT national audit 2015 there was an open comment about cell salvage. ... Cell salvage was supported by omission of saying it should not be used in cancer surgery.

These data form observational and database studies are reassuring that cell salvage is not associated with metastatic disease in cancer surgery. We support the need for a large multicentre RCT to test non-inferiority of intraoperative cell salvage compared to allogenic blood transfusion in this setting

---

<sup>1</sup> Keine IAKH- Mitglieder

## Referenzen

1. Catling S, Williams S, Freitas O et al. (2008) Use of a leucocyte filter to remove tumour cells from intra-operative cell salvage blood. *Anaesthesia* 63:1332-1338
2. Edelman MJ, Potter P, Mahaffey KG et al. (1996) The potential for reintroduction of tumor cells during intraoperative blood salvage: reduction of risk with use of the RC-400 leukocyte depletion filter. *Urology* 47:179-181
3. Futamura N, Nakanishi H, Hirose H et al. (2005) The effect of storage on the survival of cancer cells in blood and efficient elimination of contaminating cancer cells by a leukocyte depletion filter. *The American surgeon* 71:585-590
4. Gartner HV, Seidl C, Luckenbach C et al. (1996) Genetic analysis of a sarcoma accidentally transplanted from a patient to a surgeon. *The New England journal of medicine* 335:1494-1496
5. Kongsgaard UE, Wang MY, Kvalheim G (1996) Leucocyte depletion filter removes cancer cells in human blood. *Acta anaesthesiologica Scandinavica* 40:118-120
6. Kumar N, Ahmed Q, Lee VK et al. (2016) Are we ready for the use of intraoperative salvaged blood in metastatic spine tumour surgery? *European spine journal : official publication of the European Spine Society, the European Spinal Deformity Society, and the European Section of the Cervical Spine Research Society* 25:3997-4007
7. Kumar N, Lam R, Zaw AS et al. (2014) Flow cytometric evaluation of the safety of intraoperative salvaged blood filtered with leucocyte depletion filter in spine tumour surgery. *Annals of surgical oncology* 21:4330-4335
8. Liang TB, Li DL, Liang L et al. (2008) Intraoperative blood salvage during liver transplantation in patients with hepatocellular carcinoma: efficiency of leukocyte depletion filters in the removal of tumor cells. *Transplantation* 85:863-869
9. Martin RC, Wellhausen SR, Moehle DA et al. (2005) Evaluation of intraoperative autotransfusion filtration for hepatectomy and pancreatectomy. *Annals of surgical oncology* 12:1017-1024
10. Mendizabal E, De Leon-Luis J, Gomez-Hidalgo NR et al. (2017) Maternal and perinatal outcomes in pregnancy-associated melanoma. Report of two cases and a systematic literature review. *European journal of obstetrics, gynecology, and reproductive biology* 214:131-139
11. Müller M, Kuhn DF, Hinrichs B et al. (1996) Ist die Elimination von Osteosarkomzellen durch „maschinelle Autotransfusion“ und LeukozytenDepletionsfilter möglich? . *Der Anaesthesist* 45:834-838
12. Perseghin P, Vigano M, Rocco G et al. (1997) Effectiveness of leukocyte filters in reducing tumor cell contamination after intraoperative blood salvage in lung cancer patients. *Vox sanguinis* 72:221-224
13. Yagasaki H, Ohashi H, Ito M et al. (2011) A novel mechanism of transplacental cancer transmission: natural killer/T-cell lymphoma in the paratesticular region is of maternal origin. *Blood* 117:6046-6047
